# Supplementary material
Source: PubMed Central journal article supplement (PMC10843153)
Supplement: NIHMS1934476-supplement-Supplement.pdf [file NIHMS1934476-supplement-Supplement.pdf]

## Supplementary Figure 1

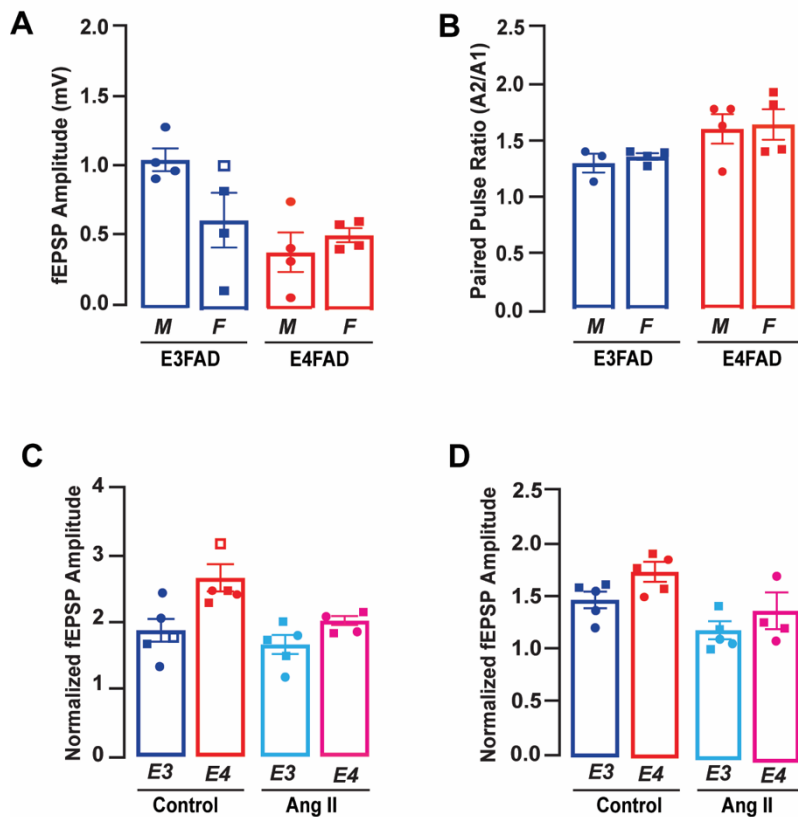

**Supplementary Figure 1. No effect of sex on synaptic facilitation in E3FAD and E4FAD mice. (A)** Two stimuli were applied to the SCCP at 20Hz and amplitudes of resulting fEPSPs were measured to assess paired pulse facilitation (PPF). The Amplitude of the first fEPSP (A1) was no different between male (circle) and female (square) E3FAD and E4FAD mice ( $F(1,11)=1.44$ ,  $p=0.26$ ) and **(B)** neither was the PPF ratio ( $F(1,11)=0.20$ ,  $p=0.66$ ). **(C)** Post Tetanic potentiation and **(D)** Long Term Potentiation of male (circle) and female (square) E3FAD and E4FAD mice. All data expressed as mean  $\pm$  SEM.  $p > 0.05$  by Two-Way ANOVA for A and B. For A and B  $n=3$  for E3FAD Male,  $n=4$  for E3FAD Female,  $n=4$  for E4FAD Male,  $n=4$  for E4FAD mice. For C and D:  $n=3$  for Male E3FAD vehicle,  $n=2$  for Female E3FAD vehicle,  $n=2$  for Male E4FAD vehicle,  $n=3$  for Female E4FAD vehicle,  $n=2$  for Male E3FAD Ang II,  $n=3$  for Female E3FAD Ang II,  $n=2$  for Male E4FAD Ang II,  $n=2$  for Female E4FAD Ang II. See Supplementary Table 1 for full details on  $n$  sizes and statistical comparisons.
